# Supplementary material
Source: MDPI journal article supplement (https://www.mdpi.com/2308-3417/8/1/19)
Supplement: s1 [file s1]

Table S1: GISAID accession IDs.

| Latest PangolinLineage | GISAID Accession ID |
|------------------------|---------------------|
| B.1.1.420              | EPI_ISL_1383943     |
| B.1.1.420              | EPI_ISL_1383952     |
| B.1.1.420              | EPI_ISL_1383961     |
| B.1.1.420              | EPI_ISL_1383972     |
| B.1.1.420              | EPI_ISL_1383976     |
| B.1.1.420              | EPI_ISL_1383993     |
| B.1.1.420              | EPI_ISL_1384003     |
| B.1.1.420              | EPI_ISL_1384470     |
| B.1.1.420              | EPI_ISL_1384517     |
| B.1.1.420              | EPI_ISL_1384520     |
| B.1.1.420              | EPI_ISL_1384529     |
| B.1.1.420              | EPI_ISL_1384548     |
| B.1.1.420              | EPI_ISL_1384549     |
| B.1.1.420              | EPI_ISL_1384553     |
| B.1.1.420              | EPI_ISL_1384615     |
| B.1.1.420              | EPI_ISL_1384616     |
| B.1.1.420              | EPI_ISL_1384617     |
| B.1.1.420              | EPI_ISL_1384618     |
| B.1.1.420              | EPI_ISL_1384619     |
| B.1.1.420              | EPI_ISL_1384620     |
| B.1.1.420              | EPI_ISL_1384621     |
| B.1.1.420              | EPI_ISL_1384622     |
| B.1.1.420              | EPI_ISL_1384623     |
| B.1.1.420              | EPI_ISL_1384624     |
| B.1.1.420              | EPI_ISL_1384625     |
| B.1.1.420              | EPI_ISL_1384626     |
| B.1.1.420              | EPI_ISL_1384627     |
| B.1.1.420              | EPI_ISL_1384629     |
| B.1.1.420              | EPI_ISL_1384630     |
| B.1.1.420              | EPI_ISL_1384631     |
| B.1.1.420              | EPI_ISL_1384632     |
| B.1.1.420              | EPI_ISL_1384633     |
| B.1.1.420              | EPI_ISL_1384634     |
| B.1.1.420              | EPI_ISL_1384635     |
| B.1.1.420              | EPI_ISL_1384636     |
| B.1.1.420              | EPI_ISL_1498604     |
| B.1.1.420              | EPI_ISL_1498628     |
| B.1.1.420              | EPI_ISL_1523202     |
| B.1.1.420              | EPI_ISL_1916531     |
| B.1.351                | EPI_ISL_1917160     |
| B.1.1.420              | EPI_ISL_1917161     |
| B.1.1.420              | EPI_ISL_1917551     |
| B.1.1.420              | EPI_ISL_1917552     |
| B.1.1.420              | EPI_ISL_1917553     |
| B.1.1.420              | EPI_ISL_1917554     |

|           |                 |
|-----------|-----------------|
| B.1.1.420 | EPI_ISL_1917556 |
| B.1.1.420 | EPI_ISL_1917557 |
| B.1.1.420 | EPI_ISL_1917558 |
| B.1.1.420 | EPI_ISL_1917559 |
| B.1.1.420 | EPI_ISL_1917561 |
| B.1.1.420 | EPI_ISL_1917562 |
| B.1.1.420 | EPI_ISL_1917563 |
| B.1.1.420 | EPI_ISL_1917564 |
| B.1.1.420 | EPI_ISL_1917565 |
| B.1.1.420 | EPI_ISL_1917569 |
| B.1.1.420 | EPI_ISL_1917570 |
| B.1.1.420 | EPI_ISL_1917572 |
| B.1.1.420 | EPI_ISL_1917573 |
| B.1.1.420 | EPI_ISL_1917574 |
| B.1.1.420 | EPI_ISL_1917576 |
| B.1.1.420 | EPI_ISL_1917578 |
| B.1.1.420 | EPI_ISL_1917579 |
| B.1.351   | EPI_ISL_3148326 |
| B.1.1.420 | EPI_ISL_1917580 |
